# Supplementary material for: Oral Fucoidan Attenuates Lung Pathology and Clinical Signs in a Severe Influenza A Mouse Model
Source: PubMed Central journal article supplement (PMC7281568; doi:10.3390/md18050246), 2020-05-08

*Supplementary Information*

# **Fucoidan decreases the severity of influenza A infection in a mouse model**

**Claire Richards <sup>1</sup>, Neil A. Williams <sup>2</sup>, Janet Helen Fitton <sup>3,\*</sup>, Damien N. Stringer<sup>3</sup>, Samuel S. Karpiniec<sup>3</sup>, Ah Young Park<sup>3</sup>**

<sup>1</sup> Charles River Laboratories, Bristol, BS20 7AW, UK; [claire.richards@crl.com](mailto:claire.richards@crl.com)

<sup>2</sup> KWS BioTest Ltd., Bristol, BS20 7AW, UK; [neil.williams9@icloud.com](mailto:neil.williams9@icloud.com)

<sup>3</sup> Marinova, 249 Kennedy Drive, Cambridge, 7170Australia; [damien.stringer@marinova.com.au](mailto:damien.stringer@marinova.com.au) (D.N.S.); [sam.karpiniec@marinova.com.au](mailto:sam.karpiniec@marinova.com.au) (S.S.K.), [ahyoung.park@marinova.com.au](mailto:ahyoung.park@marinova.com.au) (A.Y.P)

\* Correspondence: [helen.fitton@marinova.com.au](mailto:helen.fitton@marinova.com.au); Tel.: +61-3-6248-5800; Fax: +61-3-6248-4062.

Contents

|            |                                                                                                                           |         |
|------------|---------------------------------------------------------------------------------------------------------------------------|---------|
| Table S1   | Bodyweight in treatment model                                                                                             | Page 3  |
| Table S2   | Clinical observation in treatment model                                                                                   | Page 3  |
| Table S3a  | Lung pathology in treatment model                                                                                         | Page 4  |
| Table S3b  | Lung histopathology in treatment model                                                                                    | Page 4  |
| Table S4   | Bodyweight in prevention model                                                                                            | Page 5  |
| Table S5   | Clinical observations in prevention model                                                                                 | Page 6  |
| Table S6   | Lung pathology in prevention model                                                                                        | Page 7  |
| Table S7   | TCID <sub>50</sub> scores in prevention model                                                                             | Page 8  |
| Table S8   | MTT optical density in prevention model                                                                                   | Page 11 |
| Figure S1. | Representative images of lung histopathology scores and area affected at termination in treatment model.                  | Page 17 |
| Figure S2. | Mean TCID <sub>50</sub> values of lung homogenates. Data are presented as mean TCID <sub>50</sub> of group (n = 5) ± SEM. | Page 17 |

Table S1. Bodyweight in treatment model.

| Bodyweights (g) (%) |    | weight (g) |      |      |      |      |      |      |      | % start weight |       |       |      |      |      |      |      |
|---------------------|----|------------|------|------|------|------|------|------|------|----------------|-------|-------|------|------|------|------|------|
|                     |    | 0          | 1    | 2    | 3    | 4    | 5    | 6    | 7    | 0              | 1     | 2     | 3    | 4    | 5    | 6    | 7    |
| Untreated           | 1  | 19         | 18.8 | 18.3 | 16.9 | 15.5 | 14.4 | 13.5 | 12.8 | 100            | 98.9  | 96.3  | 88.9 | 81.6 | 75.8 | 71.1 | 67.4 |
| Untreated           | 2  | 19.3       | 19.6 | 19.4 | 18.4 | 17.2 | 15.6 | 14.8 | 14.1 | 100            | 101.6 | 100.5 | 95.3 | 89.1 | 80.8 | 76.7 | 73.1 |
| Untreated           | 3  | 19.6       | 20.3 | 19.9 | 18.6 | 17.4 | 16.5 | 15.7 | 14.8 | 100            | 103.6 | 101.5 | 94.9 | 88.8 | 84.2 | 80.1 | 75.5 |
| Untreated           | 4  | 18.2       | 18.1 | 17.5 | 16.1 | 14.9 | 13.8 | 13.1 | 12.3 | 100            | 99.5  | 96.2  | 88.5 | 81.9 | 75.8 | 72.0 | 67.6 |
| Untreated           | 5  | 19.9       | 20.3 | 20.1 | 19.7 | 18.3 | 17   | 16.6 | 15.3 | 100            | 102.0 | 101.0 | 99.0 | 92.0 | 85.4 | 83.4 | 76.9 |
| Untreated           | 6  | 19.6       | 19.7 | 19.7 | 18.7 | 16.8 | 16   | 15.3 | 14.3 | 100            | 100.5 | 100.5 | 95.4 | 85.7 | 81.6 | 78.1 | 73.0 |
| Untreated           | 7  | 19.2       | 19.6 | 19.2 | 17.6 | 16.8 | 16   | 15   | 14.2 | 100            | 102.1 | 100.0 | 91.7 | 87.5 | 83.3 | 78.1 | 74.0 |
| Untreated           | 8  | 18.4       | 19.1 | 18.6 | 17.3 | 16.3 | 15.9 | 15.2 | 14.4 | 100            | 103.8 | 101.1 | 94.0 | 88.6 | 86.4 | 82.6 | 78.3 |
| Untreated           | 9  | 17.9       | 18.3 | 17.5 | 16.8 | 15.8 | 14.6 | 14   | 13.3 | 100            | 102.2 | 97.8  | 93.9 | 88.3 | 81.6 | 78.2 | 74.3 |
| Untreated           | 10 | 16.3       | 16.8 | 16.9 | 15.6 | 14.2 | 13.3 | 12.7 | 12   | 100            | 103.1 | 103.7 | 95.7 | 87.1 | 81.6 | 77.9 | 73.6 |
| UPF 3.52 mg/day     | 21 | 18.5       | 18.9 | 18.2 | 16.7 | 15.7 | 14.7 | 14.2 | 13.5 | 100            | 102.2 | 98.4  | 90.3 | 84.9 | 79.5 | 76.8 | 73.0 |
| UPF 3.52 mg/day     | 22 | 20.4       | 20.6 | 19.9 | 18.5 | 16.8 | 15.4 | 14.5 | 13.8 | 100            | 101.0 | 97.5  | 90.7 | 82.4 | 75.5 | 71.1 | 67.6 |
| UPF 3.52 mg/day     | 23 | 19         | 19   | 18.6 | 17.5 | 15.8 | 14.9 | 14.1 | 13.4 | 100            | 100.0 | 97.9  | 92.1 | 83.2 | 78.4 | 74.2 | 70.5 |
| UPF 3.52 mg/day     | 24 | 17.5       | 17.2 | 16.6 | 15.7 | 14.6 | 13.7 | 13   | 12.4 | 100            | 98.3  | 96.5  | 94.6 | 93.0 | 93.8 | 94.9 | 95.4 |
| UPF 3.52 mg/day     | 25 | 16.9       | 16.9 | 16.3 | 15.1 | 13.8 | 13   | 12.5 | 11.7 | 100            | 100.0 | 96.4  | 89.3 | 81.7 | 76.9 | 74.0 | 69.2 |
| UPF 3.52 mg/day     | 26 | 18.7       | 19.2 | 18.5 | 17.9 | 16.4 | 15.3 | 14.3 | 14   | 100            | 102.7 | 98.9  | 95.7 | 87.7 | 81.8 | 76.5 | 74.9 |
| UPF 3.52 mg/day     | 27 | 17.7       | 17.1 | 16.9 | 16.1 | 14.9 | 13.9 | 13.5 | 12.9 | 100            | 96.6  | 95.5  | 91.0 | 84.2 | 78.5 | 76.3 | 72.9 |
| UPF 3.52 mg/day     | 28 | 20         | 19.9 | 19.5 | 18.4 | 17.4 | 16.3 | 16   | 15.1 | 100            | 99.5  | 97.5  | 92.0 | 87.0 | 81.5 | 80.0 | 75.5 |
| UPF 3.52 mg/day     | 29 | 20.5       | 20.1 | 19.1 | 18.7 | 17.3 | 16.2 | 15.6 | 14.9 | 100            | 98.0  | 93.2  | 91.2 | 84.4 | 79.0 | 76.1 | 72.7 |
| UPF 3.52 mg/day     | 30 | 18.3       | 18.1 | 17.2 | 16.4 | 15.4 | 14.4 | 14   | 13.4 | 100            | 98.9  | 94.0  | 89.6 | 84.2 | 78.7 | 76.5 | 73.2 |

Red cells bodyweights <90%, yellow cells bodyweight <80%.

Table S2. Clinical observations in treatment model.

| Day             |    | 0 | 1 | 2   | 3   | 4   | 5   | 6   | 7   |
|-----------------|----|---|---|-----|-----|-----|-----|-----|-----|
| Untreated       | 1  | 0 | 0 | 0.5 | 0.5 | 2.5 | 3   | 3   | 3   |
| Untreated       | 2  | 0 | 0 | 0   | 0   | 0.5 | 1   | 3   | 3   |
| Untreated       | 3  | 0 | 0 | 0   | 0.5 | 2   | 3   | 3   | 3.5 |
| Untreated       | 4  | 0 | 0 | 0   | 1.5 | 2   | 3   | 3.5 | 3.5 |
| Untreated       | 5  | 0 | 0 | 0   | 0.5 | 1.5 | 2   | 2   | 3.5 |
| Untreated       | 6  | 0 | 0 | 0   | 0.5 | 1   | 2   | 3   | 2.5 |
| Untreated       | 7  | 0 | 0 | 0   | 0.5 | 1.5 | 1.5 | 2   | 2.5 |
| Untreated       | 8  | 0 | 0 | 0   | 0.5 | 2   | 2   | 2.5 | 3.5 |
| Untreated       | 9  | 0 | 0 | 0   | 1   | 1   | 2.5 | 3   | 3   |
| Untreated       | 10 | 0 | 0 | 0   | 1.5 | 1.5 | 1.5 | 3   | 3   |
| UPF 3.52 mg/day | 21 | 0 | 0 | 0   | 0.5 | 2.5 | 2   | 2.5 | 3   |
| UPF 3.52 mg/day | 22 | 0 | 0 | 0   | 1   | 2.5 | 3   | 3   | 4   |
| UPF 3.52 mg/day | 23 | 0 | 0 | 0.5 | 1   | 1   | 3   | 3   | 3.5 |
| UPF 3.52 mg/day | 24 | 0 | 0 | 0.5 | 1   | 3   | 2.5 | 3.5 | 4   |
| UPF 3.52 mg/day | 25 | 0 | 0 | 0   | 1   | 2   | 3   | 2.5 | 4   |
| UPF 3.52 mg/day | 26 | 0 | 0 | 0   | 1.5 | 1.5 | 2   | 3.5 | 3.5 |
| UPF 3.52 mg/day | 27 | 0 | 0 | 0.5 | 0.5 | 1.5 | 2.5 | 2.5 | 3   |
| UPF 3.52 mg/day | 28 | 0 | 0 | 0   | 0.5 | 1.5 | 2   | 3.5 | 3   |
| UPF 3.52 mg/day | 29 | 0 | 0 | 0   | 1.5 | 1   | 2   | 3   | 3   |
| UPF 3.52 mg/day | 30 | 0 | 0 | 0.5 | 0.5 | 2.5 | 1.5 | 2.5 | 3.5 |

Scoring system 0-5 based on incidence of piloerection, hunched posture, abnormal breathing (to include rapid, irregular or slowed breathing), impaired mobility and ocular discharge. Each parameter is given a score of 0 = not present, 0.5 = partially and 1 = present. The scores are added together to give a maximum score of 5.

Table S3a. Lung pathology in treatment model.

|                 |    | % lung pathology | Lung path (0-5) | Lung weight |
|-----------------|----|------------------|-----------------|-------------|
| Untreated       | 1  | 90               | 4.5             | 0.36        |
| Untreated       | 2  | 60               | 3               | 0.316       |
| Untreated       | 3  | 80               | 4               | 0.336       |
| Untreated       | 4  | 80               | 4               | 0.354       |
| Untreated       | 5  | 80               | 4               | 0.346       |
| Untreated       | 6  | 90               | 4.5             | 0.328       |
| Untreated       | 7  | 60               | 3               | 0.294       |
| Untreated       | 8  | 60               | 3               | 0.278       |
| Untreated       | 9  | 70               | 3.5             | 0.278       |
| Untreated       | 10 | 90               | 4.5             | 0.288       |
| UPF 3.52 mg/day | 21 | 30               | 1.5             | 0.384       |
| UPF 3.52 mg/day | 22 | 60               | 3               | 0.408       |
| UPF 3.52 mg/day | 23 | 80               | 4               | 0.256       |
| UPF 3.52 mg/day | 24 | 60               | 3               | 0.346       |
| UPF 3.52 mg/day | 25 | 70               | 3.5             | 0.298       |
| UPF 3.52 mg/day | 26 | 40               | 2               | 0.316       |
| UPF 3.52 mg/day | 27 | 50               | 2.5             | 0.33        |
| UPF 3.52 mg/day | 28 | 60               | 3               | 0.308       |
| UPF 3.52 mg/day | 29 | 70               | 3.5             | 0.308       |
| UPF 3.52 mg/day | 30 | 80               | 4               | 0.31        |

Table S3b. Lung histopathology in treatment model.

| Slide ID number<br>[animal number] | Bronchitis | Interstit | Alveolitis | Pleuritis | Haemorrhage | PV<br>Lymphoid | Total<br>Pathology | %Area |
|------------------------------------|------------|-----------|------------|-----------|-------------|----------------|--------------------|-------|
| E0161-14 [1.1]                     | 2          | 1         | 1          | 0         | 0           | 0              | 4                  | 50    |
| E0162-14 [1.2]                     | 2          | 2         | 1          | 0         | 1           | 1              | 7                  | 75    |
| E0163-14 [1.3]                     | 3          | 2         | 1          | 0         | 3           | 0              | 9                  | 75    |
| E0164-14 [1.4]                     | 1          | 2         | 1          | 1         | 0           | 1              | 6                  | 50    |
| E0165-14 [1.5]                     | 1          | 2         | 1          | 0         | 0           | 1              | 5                  | 50    |
| E0166-14 [1.6]                     | 2          | 2         | 1          | 0         | 0           | 1              | 6                  | 50    |
| E0167-14 [1.7]                     | 2          | 2         | 1          | 1         | 1           | 1              | 8                  | 80    |
| E0168-14 [1.8]                     | 2          | 3         | 1          | 0         | 1           | 1              | 8                  | 100   |
| E0169-14 [1.9]                     | 2          | 2         | 1          | 1         | 1           | 1              | 8                  | 50    |
| E0170-14 [1.10]                    | 2          | 2         | 1          | 0         | 0           | 0              | 5                  | 75    |
| E0181-14 [3.21]                    | 3          | 2         | 1          | 0         | 1           | 1              | 8                  | 50    |
| E0182-14 [3.22]                    | 2          | 2         | 1          | 0         | 0           | 0              | 5                  | 90    |
| E0183-14 [3.23]                    | 2          | 2         | 1          | 0         | 0           | 0              | 5                  | 90    |
| E0184-14 [3.24]                    | 2          | 3         | 1          | 1         | 0           | 0              | 7                  | 50    |
| E0185-14 [3.25]                    | 2          | 2         | 1          | 0         | 1           | 0              | 6                  | 80    |
| E0186-14 [3.26]                    | 2          | 2         | 1          | 0         | 0           | 1              | 6                  | 75    |
| E0187-14 [3.27]                    | 2          | 2         | 1          | 0         | 0           | 0              | 5                  | 50    |
| E0188-14 [3.28]                    | 2          | 2         | 1          | 1         | 0           | 0              | 6                  | 75    |
| E0189-14 [3.29]                    | 2          | 2         | 1          | 0         | 1           | 0              | 6                  | 90    |
| E0190-14 [3.30]                    | 2          | 2         | 1          | 0         | 0           | 0              | 5                  | 60    |

Table S4. Bodyweight in prevention model

|                                          | 0    | 1    | 2    | 3    | 4    | 5    | 6    | 7    | 0    | 1     | 2     | 3     | 4     | 5    | 6    | 7    |      |
|------------------------------------------|------|------|------|------|------|------|------|------|------|-------|-------|-------|-------|------|------|------|------|
| 1. Untreated                             | 1.1  | 20.1 | 20.1 | 20.6 | 20.3 | 19.1 | 19.1 | 18.1 | 16.5 | 100.0 | 100.0 | 102.5 | 101.0 | 95.0 | 95.0 | 90.0 | 82.1 |
| 1. Untreated                             | 1.2  | 17.1 | 17.6 | 18.1 | 16.9 | 15.2 | 13.6 | 13.0 | 12.4 | 100.0 | 102.9 | 105.8 | 98.8  | 88.9 | 79.5 | 76.0 | 72.5 |
| 1. Untreated                             | 1.3  | 17.8 | 17.9 | 18.0 | 17.4 | 15.9 | 14.8 | 14.0 | 13.5 | 100.0 | 100.6 | 101.1 | 97.8  | 89.3 | 83.1 | 78.7 | 75.8 |
| 1. Untreated                             | 1.4  | 17.1 | 17.5 | 18.1 | 17.5 | 16.4 | 14.9 | 14.1 | 13.2 | 100.0 | 102.3 | 105.8 | 102.3 | 95.9 | 87.1 | 82.5 | 77.2 |
| 1. Untreated                             | 1.5  | 16.8 | 17.0 | 17.2 | 16.5 | 15.4 | 15.0 | 14.3 | 13.2 | 100.0 | 101.2 | 102.4 | 98.2  | 91.7 | 89.3 | 85.1 | 78.6 |
| 1. Untreated                             | 1.6  | 16.4 | 17.0 | 17.7 | 16.6 | 15.3 | 14.5 | 13.4 | 12.5 | 100.0 | 103.7 | 107.9 | 101.2 | 93.3 | 88.4 | 81.7 | 76.2 |
| 1. Untreated                             | 1.7  | 17.8 | 17.9 | 18.3 | 16.9 | 15.8 | 15.0 | 13.8 | 13.3 | 100.0 | 100.6 | 102.8 | 94.9  | 88.8 | 84.3 | 77.5 | 74.7 |
| 1. Untreated                             | 1.8  | 16.3 | 17.1 | 17.4 | 16.0 | 14.6 | 13.2 | 12.5 | 12.0 | 100.0 | 104.9 | 106.7 | 98.2  | 89.6 | 81.0 | 76.7 | 73.6 |
| 1. Untreated                             | 1.9  | 19.1 | 19.1 | 20.1 | 19.4 | 17.8 | 16.7 | 15.8 | 14.4 | 100.0 | 100.0 | 105.2 | 101.6 | 93.2 | 87.4 | 82.7 | 75.4 |
| 1. Untreated                             | 1.10 | 18.0 | 17.8 | 18.7 | 17.5 | 16.6 | 15.5 | 15.0 | 13.7 | 100.0 | 98.9  | 103.9 | 97.2  | 92.2 | 86.1 | 83.3 | 76.1 |
| 1. Untreated satellite                   | 1.11 | 17.0 | 16.7 | 17.6 | 16.3 |      |      |      |      | 100.0 | 98.2  | 103.5 | 95.9  |      |      |      |      |
| 1. Untreated satellite                   | 1.12 | 17.8 | 17.7 | 18.0 | 16.7 |      |      |      |      | 100.0 | 99.4  | 101.1 | 93.8  |      |      |      |      |
| 1. Untreated satellite                   | 1.13 | 19.7 | 19.6 | 19.9 | 19.1 |      |      |      |      | 100.0 | 99.5  | 101.0 | 97.0  |      |      |      |      |
| 1. Untreated satellite                   | 1.14 | 17.5 | 17.8 | 18.4 | 16.6 |      |      |      |      | 100.0 | 101.7 | 105.1 | 94.9  |      |      |      |      |
| 1. Untreated satellite                   | 1.15 | 17.3 | 17.6 | 17.7 | 17.0 |      |      |      |      | 100.0 | 101.7 | 102.3 | 98.3  |      |      |      |      |
| 2. Undaria Fucoidan 3.52mg/day           | 2.16 | 18.2 | 18.2 | 18.7 | 18.3 | 16.8 | 15.6 | 14.5 | 13.6 | 100.0 | 100.0 | 102.7 | 100.5 | 92.3 | 85.7 | 79.7 | 74.7 |
| 2. Undaria Fucoidan 3.52mg/day           | 2.17 | 18.8 | 18.5 | 18.8 | 18.3 | 17.1 | 15.8 | 15.3 | 14.2 | 100.0 | 98.4  | 100.0 | 97.3  | 91.0 | 84.0 | 81.4 | 75.5 |
| 2. Undaria Fucoidan 3.52mg/day           | 2.18 | 20.3 | 20.7 | 20.7 | 20.0 | 18.2 | 16.2 | 15.4 | 14.4 | 100.0 | 102.0 | 102.0 | 98.5  | 89.7 | 79.8 | 75.9 | 70.9 |
| 2. Undaria Fucoidan 3.52mg/day           | 2.19 | 17.4 | 17.8 | 18.7 | 17.5 | 16.5 | 14.8 | 13.7 | 12.8 | 100.0 | 102.3 | 107.5 | 100.6 | 94.8 | 85.1 | 78.7 | 73.6 |
| 2. Undaria Fucoidan 3.52mg/day           | 2.20 | 19.1 | 19.1 | 19.5 | 18.4 | 17.4 | 15.9 | 15.4 | 14.1 | 100.0 | 100.0 | 102.1 | 96.3  | 91.1 | 83.2 | 80.6 | 73.8 |
| 2. Undaria Fucoidan 3.52mg/day           | 2.21 | 18.8 | 19.0 | 19.0 | 17.8 | 16.5 | 15.0 | 14.0 | 12.8 | 100.0 | 101.1 | 101.1 | 94.7  | 87.8 | 79.8 | 74.5 | 68.1 |
| 2. Undaria Fucoidan 3.52mg/day           | 2.22 | 19.9 | 20.0 | 20.2 | 19.4 | 18.5 | 17.3 | 16.0 | 14.7 | 100.0 | 100.5 | 101.5 | 97.5  | 93.0 | 86.9 | 80.4 | 73.9 |
| 2. Undaria Fucoidan 3.52mg/day           | 2.23 | 16.7 | 17.1 | 17.0 | 16.4 | 15.4 | 14.0 | 13.4 | 12.8 | 100.0 | 102.4 | 101.8 | 98.2  | 92.2 | 83.8 | 80.2 | 76.6 |
| 2. Undaria Fucoidan 3.52mg/day           | 2.24 | 16.2 | 16.8 | 17.1 | 15.8 | 14.6 | 13.1 | 12.2 | 11.8 | 100.0 | 103.7 | 105.6 | 97.5  | 90.1 | 80.9 | 75.3 | 72.8 |
| 2. Undaria Fucoidan 3.52mg/day           | 2.25 | 19.6 | 19.4 | 20.5 | 19.1 | 17.6 | 15.8 | 14.8 | 13.8 | 100.0 | 99.0  | 104.6 | 97.4  | 89.8 | 80.6 | 75.5 | 70.4 |
| 2. Undaria Fucoidan 3.52mg/day satellite | 2.26 | 17.9 | 18.4 | 18.6 | 17.9 |      |      |      |      | 100.0 | 102.8 | 103.9 | 100.0 |      |      |      |      |
| 2. Undaria Fucoidan 3.52mg/day satellite | 2.27 | 19.4 | 19.4 | 19.4 | 18.3 |      |      |      |      | 100.0 | 100.0 | 100.0 | 94.3  |      |      |      |      |
| 2. Undaria Fucoidan 3.52mg/day satellite | 2.28 | 18.3 | 18.5 | 18.6 | 18.1 |      |      |      |      | 100.0 | 101.1 | 101.6 | 98.9  |      |      |      |      |
| 2. Undaria Fucoidan 3.52mg/day satellite | 2.29 | 17.8 | 17.8 | 18.0 | 16.7 |      |      |      |      | 100.0 | 100.0 | 101.1 | 93.8  |      |      |      |      |
| 2. Undaria Fucoidan 3.52mg/day satellite | 2.30 | 18.1 | 17.7 | 18.3 | 17.1 |      |      |      |      | 100.0 | 97.8  | 101.1 | 94.5  |      |      |      |      |
| 3. Undaria Fucoidan 7.04mg/day           | 3.31 | 19.5 | 19.5 | 19.3 | 18.1 | 16.8 | 15.5 | 14.6 | 13.8 | 100.0 | 100.0 | 99.0  | 92.8  | 86.2 | 79.5 | 74.9 | 70.8 |
| 3. Undaria Fucoidan 7.04mg/day           | 3.32 | 19.7 | 19.8 | 20.1 | 18.8 | 17.0 | 15.7 | 14.8 | 13.6 | 100.0 | 100.5 | 102.0 | 95.4  | 86.3 | 79.7 | 75.1 | 69.0 |
| 3. Undaria Fucoidan 7.04mg/day           | 3.33 | 19.1 | 18.8 | 18.8 | 17.3 | 16.1 | 14.8 | 14.4 | 13.7 | 100.0 | 98.4  | 98.4  | 90.6  | 84.3 | 77.5 | 75.4 | 71.7 |
| 3. Undaria Fucoidan 7.04mg/day           | 3.34 | 18.9 | 19.6 | 19.6 | 18.3 | 17.3 | 16.1 | 15.2 | 14.1 | 100.0 | 103.7 | 103.7 | 96.8  | 91.5 | 85.2 | 80.4 | 74.6 |
| 3. Undaria Fucoidan 7.04mg/day           | 3.35 | 18.8 | 19.2 | 19.3 | 18.4 | 17.0 | 15.1 | 14.3 | 13.3 | 100.0 | 102.1 | 102.7 | 97.9  | 90.4 | 80.3 | 76.1 | 70.7 |
| 3. Undaria Fucoidan 7.04mg/day           | 3.36 | 18.6 | 18.5 | 19.0 | 17.9 | 16.8 | 15.3 | 14.3 | 13.5 | 100.0 | 99.5  | 102.2 | 96.2  | 90.3 | 82.3 | 76.9 | 72.6 |
| 3. Undaria Fucoidan 7.04mg/day           | 3.37 | 19.9 | 20.0 | 20.8 | 20.1 | 19.1 | 17.7 | 16.4 | 15.0 | 100.0 | 100.5 | 104.5 | 101.0 | 96.0 | 88.9 | 82.4 | 75.4 |
| 3. Undaria Fucoidan 7.04mg/day           | 3.38 | 19.7 | 20.2 | 20.6 | 20.0 | 19.2 | 17.9 | 16.7 | 15.4 | 100.0 | 102.5 | 104.6 | 101.5 | 97.5 | 90.9 | 84.8 | 78.2 |
| 3. Undaria Fucoidan 7.04mg/day           | 3.39 | 18.7 | 18.9 | 18.9 | 18.1 | 17.2 | 15.4 | 14.5 | 13.4 | 100.0 | 101.1 | 101.1 | 96.8  | 92.0 | 82.4 | 77.5 | 71.7 |
| 3. Undaria Fucoidan 7.04mg/day           | 3.40 | 18.2 | 18.0 | 18.3 | 18.0 | 16.9 | 15.5 | 14.5 | 13.6 | 100.0 | 98.9  | 100.5 | 98.9  | 92.9 | 85.2 | 79.7 | 74.7 |
| 3. Undaria Fucoidan 7.04mg/day satellite | 3.41 | 16.9 | 17.0 | 17.4 | 16.5 |      |      |      |      | 100.0 | 100.6 | 103.0 | 97.6  |      |      |      |      |
| 3. Undaria Fucoidan 7.04mg/day satellite | 3.42 | 18.7 | 19.1 | 19.8 | 18.0 |      |      |      |      | 100.0 | 102.1 | 105.9 | 96.3  |      |      |      |      |
| 3. Undaria Fucoidan 7.04mg/day satellite | 3.43 | 18.0 | 18.2 | 19.1 | 18.3 |      |      |      |      | 100.0 | 101.1 | 106.1 | 101.7 |      |      |      |      |
| 3. Undaria Fucoidan 7.04mg/day satellite | 3.44 | 17.7 | 17.9 | 18.9 | 17.9 |      |      |      |      | 100.0 | 101.1 | 106.8 | 101.1 |      |      |      |      |
| 3. Undaria Fucoidan 7.04mg/day satellite | 3.45 | 17.1 | 17.3 | 17.6 | 16.1 |      |      |      |      | 100.0 | 101.2 | 102.9 | 94.2  |      |      |      |      |

Table S5. Clinical observations in prevention model

|                                          |      | 0   | 1   | 2   | 3   | 4   | 5   | 6   | 7   |
|------------------------------------------|------|-----|-----|-----|-----|-----|-----|-----|-----|
| 1. Untreated                             | 1.1  | 0.0 | 0.0 | 0.0 | 0.5 | 0.5 | 1.0 | 2.5 | 3.5 |
| 1. Untreated                             | 1.2  | 0.0 | 0.0 | 0.5 | 1.0 | 2.0 | 2.5 | 3.0 | 4.0 |
| 1. Untreated                             | 1.3  | 0.0 | 0.0 | 0.0 | 0.5 | 0.5 | 2.5 | 2.5 | 3.5 |
| 1. Untreated                             | 1.4  | 0.0 | 0.0 | 0.0 | 1.5 | 1.5 | 2.5 | 3.0 | 4.0 |
| 1. Untreated                             | 1.5  | 0.0 | 0.0 | 0.0 | 0.5 | 0.5 | 1.5 | 1.5 | 3.5 |
| 1. Untreated                             | 1.6  | 0.0 | 0.0 | 0.0 | 1.0 | 1.0 | 2.0 | 2.0 | 3.0 |
| 1. Untreated                             | 1.7  | 0.0 | 0.0 | 0.5 | 1.0 | 1.5 | 2.0 | 3.0 | 3.5 |
| 1. Untreated                             | 1.8  | 0.0 | 0.0 | 0.0 | 0.0 | 1.5 | 2.5 | 3.0 | 3.5 |
| 1. Untreated                             | 1.9  | 0.0 | 0.0 | 0.0 | 0.0 | 0.0 | 2.0 | 1.5 | 4.0 |
| 1. Untreated                             | 1.10 | 0.0 | 0.5 | 0.5 | 0.5 | 1.5 | 2.0 | 3.0 | 4.0 |
| 1. Untreated satellite                   | 1.11 | 0.0 | 0.0 | 0.0 | 1.0 |     |     |     |     |
| 1. Untreated satellite                   | 1.12 | 0.0 | 0.0 | 0.0 | 0.5 |     |     |     |     |
| 1. Untreated satellite                   | 1.13 | 0.0 | 0.0 | 0.0 | 0.5 |     |     |     |     |
| 1. Untreated satellite                   | 1.14 | 0.0 | 0.0 | 0.0 | 1.5 |     |     |     |     |
| 1. Untreated satellite                   | 1.15 | 0.0 | 0.5 | 0.5 | 1.0 |     |     |     |     |
| 2. Undaria Fucoidan 3.52mg/day           | 2.16 | 0.0 | 0.0 | 0.0 | 1.0 | 1.5 | 2.0 | 2.5 | 4.0 |
| 2. Undaria Fucoidan 3.52mg/day           | 2.17 | 0.0 | 0.5 | 0.0 | 0.5 | 0.5 | 1.5 | 2.5 | 3.5 |
| 2. Undaria Fucoidan 3.52mg/day           | 2.18 | 0.0 | 0.0 | 0.0 | 0.5 | 1.5 | 2.0 | 2.5 | 4.0 |
| 2. Undaria Fucoidan 3.52mg/day           | 2.19 | 0.0 | 0.0 | 0.0 | 0.0 | 1.0 | 2.0 | 3.0 | 4.0 |
| 2. Undaria Fucoidan 3.52mg/day           | 2.20 | 0.0 | 0.5 | 0.5 | 1.0 | 1.5 | 2.0 | 3.0 | 3.5 |
| 2. Undaria Fucoidan 3.52mg/day           | 2.21 | 0.0 | 0.0 | 0.0 | 0.5 | 1.5 | 2.0 | 3.5 | 3.0 |
| 2. Undaria Fucoidan 3.52mg/day           | 2.22 | 0.0 | 0.5 | 0.0 | 0.0 | 1.0 | 1.0 | 2.5 | 4.0 |
| 2. Undaria Fucoidan 3.52mg/day           | 2.23 | 0.0 | 0.0 | 0.5 | 1.0 | 2.0 | 2.0 | 3.0 | 4.0 |
| 2. Undaria Fucoidan 3.52mg/day           | 2.24 | 0.0 | 0.0 | 0.0 | 1.0 | 1.0 | 2.0 | 3.5 | 4.0 |
| 2. Undaria Fucoidan 3.52mg/day           | 2.25 | 0.0 | 0.0 | 0.0 | 1.0 | 2.0 | 1.5 | 2.5 | 3.5 |
| 2. Undaria Fucoidan 3.52mg/day satellite | 2.26 | 0.0 | 0.0 | 0.0 | 0.5 |     |     |     |     |
| 2. Undaria Fucoidan 3.52mg/day satellite | 2.27 | 0.0 | 0.0 | 0.0 | 0.5 |     |     |     |     |
| 2. Undaria Fucoidan 3.52mg/day satellite | 2.28 | 0.0 | 0.0 | 0.0 | 0.5 |     |     |     |     |
| 2. Undaria Fucoidan 3.52mg/day satellite | 2.29 | 0.0 | 0.0 | 0.0 | 1.5 |     |     |     |     |
| 2. Undaria Fucoidan 3.52mg/day satellite | 2.30 | 0.0 | 0.5 | 0.0 | 0.5 |     |     |     |     |
| 3. Undaria Fucoidan 7.04mg/day           | 3.31 | 0.0 | 0.0 | 0.0 | 1.0 | 0.5 | 2.0 | 2.5 | 4.0 |
| 3. Undaria Fucoidan 7.04mg/day           | 3.32 | 0.0 | 0.0 | 0.0 | 1.5 | 0.5 | 1.5 | 2.5 | 3.0 |
| 3. Undaria Fucoidan 7.04mg/day           | 3.33 | 0.0 | 0.0 | 0.0 | 1.0 | 1.0 | 1.0 | 3.5 | 3.5 |
| 3. Undaria Fucoidan 7.04mg/day           | 3.34 | 0.0 | 0.0 | 0.0 | 0.5 | 1.0 | 1.5 | 2.5 | 3.0 |
| 3. Undaria Fucoidan 7.04mg/day           | 3.35 | 0.0 | 0.0 | 0.0 | 0.0 | 1.5 | 2.0 | 2.0 | 3.5 |
| 3. Undaria Fucoidan 7.04mg/day           | 3.36 | 0.0 | 0.0 | 0.0 | 0.5 | 0.0 | 0.5 | 2.0 | 1.5 |
| 3. Undaria Fucoidan 7.04mg/day           | 3.37 | 0.0 | 0.0 | 0.0 | 0.0 | 0.0 | 1.0 | 3.0 | 2.5 |
| 3. Undaria Fucoidan 7.04mg/day           | 3.38 | 0.0 | 0.0 | 0.0 | 1.0 | 1.0 | 1.5 | 2.0 | 3.0 |
| 3. Undaria Fucoidan 7.04mg/day           | 3.39 | 0.0 | 0.0 | 0.0 | 0.5 | 0.5 | 1.0 | 1.5 | 3.0 |
| 3. Undaria Fucoidan 7.04mg/day           | 3.40 | 0.0 | 0.0 | 0.0 | 1.0 | 0.5 | 1.0 | 1.5 | 2.0 |
| 3. Undaria Fucoidan 7.04mg/day satellite | 3.41 | 0.0 | 0.0 | 0.0 | 1.0 |     |     |     |     |
| 3. Undaria Fucoidan 7.04mg/day satellite | 3.42 | 0.0 | 0.5 | 0.0 | 1.5 |     |     |     |     |
| 3. Undaria Fucoidan 7.04mg/day satellite | 3.43 | 0.0 | 0.0 | 0.5 | 0.5 |     |     |     |     |
| 3. Undaria Fucoidan 7.04mg/day satellite | 3.44 | 0.0 | 0.0 | 0.0 | 1.0 |     |     |     |     |
| 3. Undaria Fucoidan 7.04mg/day satellite | 3.45 | 0.0 | 0.0 | 0.5 | 1.5 |     |     |     |     |

Scoring system 0-5 based on incidence of piloerection, hunched posture, abnormal breathing (to include rapid, irregular or slowed breathing), impaired mobility and ocular discharge. Each parameter is given a score of 0 = not present, 0.5 = partially and 1 = present. The scores are added together to give a maximum score of 5.

Table S6. Lung pathology in prevention model.

|                                |      | Lung pathology | Lung weight |
|--------------------------------|------|----------------|-------------|
| 1. Untreated                   | 1.1  | 85             | 0.340       |
| 1. Untreated                   | 1.2  | 90             | 0.335       |
| 1. Untreated                   | 1.3  | 75             | 0.295       |
| 1. Untreated                   | 1.4  | 75             | 0.330       |
| 1. Untreated                   | 1.5  | 90             | 0.290       |
| 1. Untreated                   | 1.6  | 60             | 0.370       |
| 1. Untreated                   | 1.7  | 80             | 0.295       |
| 1. Untreated                   | 1.8  | 90             | 0.325       |
| 1. Untreated                   | 1.9  | 95             | 0.355       |
| 1. Untreated                   | 1.10 | 80             | 0.345       |
| 2. Undaria Fucoidan 3.52mg/day | 2.16 | 90             | 0.330       |
| 2. Undaria Fucoidan 3.52mg/day | 2.17 | 80             | 0.315       |
| 2. Undaria Fucoidan 3.52mg/day | 2.18 | 75             | 0.425       |
| 2. Undaria Fucoidan 3.52mg/day | 2.19 | 85             | 0.360       |
| 2. Undaria Fucoidan 3.52mg/day | 2.20 | 95             | 0.400       |
| 2. Undaria Fucoidan 3.52mg/day | 2.21 | 90             | 0.370       |
| 2. Undaria Fucoidan 3.52mg/day | 2.22 | 75             | 0.350       |
| 2. Undaria Fucoidan 3.52mg/day | 2.23 | 75             | 0.270       |
| 2. Undaria Fucoidan 3.52mg/day | 2.24 | 90             | 0.335       |
| 2. Undaria Fucoidan 3.52mg/day | 2.25 | 80             | 0.365       |
| 3. Undaria Fucoidan 7.04mg/day | 3.31 | 30             | 0.380       |
| 3. Undaria Fucoidan 7.04mg/day | 3.32 | 80             | 0.410       |
| 3. Undaria Fucoidan 7.04mg/day | 3.33 | 70             | 0.295       |
| 3. Undaria Fucoidan 7.04mg/day | 3.34 | 50             | 0.320       |
| 3. Undaria Fucoidan 7.04mg/day | 3.35 | 60             | 0.340       |
| 3. Undaria Fucoidan 7.04mg/day | 3.36 | 75             | 0.335       |
| 3. Undaria Fucoidan 7.04mg/day | 3.37 | 60             | 0.335       |
| 3. Undaria Fucoidan 7.04mg/day | 3.38 | 80             | 0.395       |
| 3. Undaria Fucoidan 7.04mg/day | 3.39 | 90             | 0.395       |
| 3. Undaria Fucoidan 7.04mg/day | 3.40 | 60             | 0.285       |

Table S7. TCID<sub>50</sub> scores.

| 1.11            |                  |         |         |              |                |     |            |       |                           |                                         |  |
|-----------------|------------------|---------|---------|--------------|----------------|-----|------------|-------|---------------------------|-----------------------------------------|--|
| Dilution        | Dilution         | No. pos | No. neg | Infected (A) | Uninfected (B) | A+B | % infected | Index | TCID <sub>50</sub> /25 µl | TCID <sub>50</sub> /ml                  |  |
| 10 <sup>1</sup> | 10 <sup>-1</sup> | 3       | 0       | 14           | 0              | 14  | 100%       | 0.253 | 1 x 10 <sup>5</sup> .253  | 4 x 10 <sup>6</sup> .253<br>7162423.4   |  |
| 10 <sup>2</sup> | 10 <sup>-2</sup> | 3       | 0       | 11           | 0              | 11  | 100%       |       |                           |                                         |  |
| 10 <sup>3</sup> | 10 <sup>-3</sup> | 3       | 0       | 8            | 0              | 8   | 100%       |       |                           |                                         |  |
| 10 <sup>4</sup> | 10 <sup>-4</sup> | 3       | 0       | 5            | 0              | 5   | 100%       |       |                           |                                         |  |
| 10 <sup>5</sup> | 10 <sup>-5</sup> | 2       | 1       | 2            | 1              | 3   | 67%        |       |                           |                                         |  |
| 10 <sup>6</sup> | 10 <sup>-6</sup> | 0       | 3       | 0            | 4              | 4   | 0%         |       |                           |                                         |  |
| 10 <sup>7</sup> | 10 <sup>-7</sup> | 0       | 3       | 0            | 7              | 7   | 0%         |       |                           |                                         |  |
| 10 <sup>8</sup> | 10 <sup>-8</sup> | 0       | 3       | 0            | 10             | 10  | 0%         |       |                           |                                         |  |
| 1.12            |                  |         |         |              |                |     |            |       |                           |                                         |  |
| Dilution        | Dilution         | No. pos | No. neg | Infected (A) | Uninfected (B) | A+B | % infected | Index | TCID <sub>50</sub> /25 µl | TCID <sub>50</sub> /ml                  |  |
| 10 <sup>1</sup> | 10 <sup>-1</sup> | 3       | 0       | 13           | 0              | 13  | 100%       | 0.746 | 1 x 10 <sup>4</sup> .746  | 4 x 10 <sup>5</sup> .746<br>2228742.99  |  |
| 10 <sup>2</sup> | 10 <sup>-2</sup> | 3       | 0       | 10           | 0              | 10  | 100%       |       |                           |                                         |  |
| 10 <sup>3</sup> | 10 <sup>-3</sup> | 3       | 0       | 7            | 0              | 7   | 100%       |       |                           |                                         |  |
| 10 <sup>4</sup> | 10 <sup>-4</sup> | 3       | 0       | 4            | 0              | 4   | 100%       |       |                           |                                         |  |
| 10 <sup>5</sup> | 10 <sup>-5</sup> | 1       | 2       | 1            | 2              | 3   | 33%        |       |                           |                                         |  |
| 10 <sup>6</sup> | 10 <sup>-6</sup> | 0       | 3       | 0            | 5              | 5   | 0%         |       |                           |                                         |  |
| 10 <sup>7</sup> | 10 <sup>-7</sup> | 0       | 3       | 0            | 8              | 8   | 0%         |       |                           |                                         |  |
| 10 <sup>8</sup> | 10 <sup>-8</sup> | 0       | 3       | 0            | 11             | 11  | 0%         |       |                           |                                         |  |
| 1.13            |                  |         |         |              |                |     |            |       |                           |                                         |  |
| Dilution        | Dilution         | No. pos | No. neg | Infected (A) | Uninfected (B) | A+B | % infected | Index | TCID <sub>50</sub> /25 µl | TCID <sub>50</sub> /ml                  |  |
| 10 <sup>1</sup> | 10 <sup>-1</sup> | 3       | 0       | 14           | 0              | 14  | 100%       | 0.253 | 1 x 10 <sup>5</sup> .253  | 4 x 10 <sup>6</sup> .253<br>7162423.41  |  |
| 10 <sup>2</sup> | 10 <sup>-2</sup> | 3       | 0       | 11           | 0              | 11  | 100%       |       |                           |                                         |  |
| 10 <sup>3</sup> | 10 <sup>-3</sup> | 3       | 0       | 8            | 0              | 8   | 100%       |       |                           |                                         |  |
| 10 <sup>4</sup> | 10 <sup>-4</sup> | 3       | 0       | 5            | 0              | 5   | 100%       |       |                           |                                         |  |
| 10 <sup>5</sup> | 10 <sup>-5</sup> | 2       | 1       | 2            | 1              | 3   | 67%        |       |                           |                                         |  |
| 10 <sup>6</sup> | 10 <sup>-6</sup> | 0       | 3       | 0            | 4              | 4   | 0%         |       |                           |                                         |  |
| 10 <sup>7</sup> | 10 <sup>-7</sup> | 0       | 3       | 0            | 7              | 7   | 0%         |       |                           |                                         |  |
| 10 <sup>8</sup> | 10 <sup>-8</sup> | 0       | 3       | 0            | 10             | 10  | 0%         |       |                           |                                         |  |
| 1.14            |                  |         |         |              |                |     |            |       |                           |                                         |  |
| Dilution        | Dilution         | No. pos | No. neg | Infected (A) | Uninfected (B) | A+B | % infected | Index | TCID <sub>50</sub> /25 µl | TCID <sub>50</sub> /ml                  |  |
| 10 <sup>1</sup> | 10 <sup>-1</sup> | 3       | 0       | 13           | 0              | 13  | 100%       | 0.746 | 1 x 10 <sup>4</sup> .746  | 4 x 10 <sup>5</sup> .746<br>2228742.99  |  |
| 10 <sup>2</sup> | 10 <sup>-2</sup> | 3       | 0       | 10           | 0              | 10  | 100%       |       |                           |                                         |  |
| 10 <sup>3</sup> | 10 <sup>-3</sup> | 3       | 0       | 7            | 0              | 7   | 100%       |       |                           |                                         |  |
| 10 <sup>4</sup> | 10 <sup>-4</sup> | 3       | 0       | 4            | 0              | 4   | 100%       |       |                           |                                         |  |
| 10 <sup>5</sup> | 10 <sup>-5</sup> | 1       | 2       | 1            | 2              | 3   | 33%        |       |                           |                                         |  |
| 10 <sup>6</sup> | 10 <sup>-6</sup> | 0       | 3       | 0            | 5              | 5   | 0%         |       |                           |                                         |  |
| 10 <sup>7</sup> | 10 <sup>-7</sup> | 0       | 3       | 0            | 8              | 8   | 0%         |       |                           |                                         |  |
| 10 <sup>8</sup> | 10 <sup>-8</sup> | 0       | 3       | 0            | 11             | 11  | 0%         |       |                           |                                         |  |
| 1.15            |                  |         |         |              |                |     |            |       |                           |                                         |  |
| Dilution        | Dilution         | No. pos | No. neg | Infected (A) | Uninfected (B) | A+B | % infected | Index | TCID <sub>50</sub> /25 µl | TCID <sub>50</sub> /ml                  |  |
| 10 <sup>1</sup> | 10 <sup>-1</sup> | 3       | 0       | 15           | 0              | 15  | 100%       | 0.500 | 1 x 10 <sup>5</sup> .500  | 4 x 10 <sup>6</sup> .500<br>12649110.64 |  |
| 10 <sup>2</sup> | 10 <sup>-2</sup> | 3       | 0       | 12           | 0              | 12  | 100%       |       |                           |                                         |  |
| 10 <sup>3</sup> | 10 <sup>-3</sup> | 3       | 0       | 9            | 0              | 9   | 100%       |       |                           |                                         |  |
| 10 <sup>4</sup> | 10 <sup>-4</sup> | 3       | 0       | 6            | 0              | 6   | 100%       |       |                           |                                         |  |
| 10 <sup>5</sup> | 10 <sup>-5</sup> | 3       | 0       | 3            | 0              | 3   | 100%       |       |                           |                                         |  |
| 10 <sup>6</sup> | 10 <sup>-6</sup> | 0       | 3       | 0            | 3              | 3   | 0%         |       |                           |                                         |  |
| 10 <sup>7</sup> | 10 <sup>-7</sup> | 0       | 3       | 0            | 6              | 6   | 0%         |       |                           |                                         |  |
| 10 <sup>8</sup> | 10 <sup>-8</sup> | 0       | 3       | 0            | 9              | 9   | 0%         |       |                           |                                         |  |



| 2.26            |                  |         |         |              |                |     |            |       |                          |                                         |
|-----------------|------------------|---------|---------|--------------|----------------|-----|------------|-------|--------------------------|-----------------------------------------|
| Dilution        | Dilution         | No. pos | No. neg | Infected (A) | Uninfected (B) | A+B | % infected | Index | TCID50/25 $\mu$ l        | TCID50/ml                               |
| 10 <sup>1</sup> | 10 <sup>-1</sup> | 3       | 0       | 13           | 0              | 13  | 100%       | 0.746 | 1 x 10 <sup>4</sup> .746 | 4 x 10 <sup>5</sup> .746<br>2228742.996 |
| 10 <sup>2</sup> | 10 <sup>-2</sup> | 3       | 0       | 10           | 0              | 10  | 100%       |       |                          |                                         |
| 10 <sup>3</sup> | 10 <sup>-3</sup> | 3       | 0       | 7            | 0              | 7   | 100%       |       |                          |                                         |
| 10 <sup>4</sup> | 10 <sup>-4</sup> | 3       | 0       | 4            | 0              | 4   | 100%       |       |                          |                                         |
| 10 <sup>5</sup> | 10 <sup>-5</sup> | 1       | 2       | 1            | 2              | 3   | 33%        |       |                          |                                         |
| 10 <sup>6</sup> | 10 <sup>-6</sup> | 0       | 3       | 0            | 5              | 5   | 0%         |       |                          |                                         |
| 10 <sup>7</sup> | 10 <sup>-7</sup> | 0       | 3       | 0            | 8              | 8   | 0%         |       |                          |                                         |
| 10 <sup>8</sup> | 10 <sup>-8</sup> | 0       | 3       | 0            | 11             | 11  | 0%         |       |                          |                                         |
| 2.27            |                  |         |         |              |                |     |            |       |                          |                                         |
| Dilution        | Dilution         | No. pos | No. neg | Infected (A) | Uninfected (B) | A+B | % infected | Index | TCID50/25 $\mu$ l        | TCID50/ml                               |
| 10 <sup>1</sup> | 10 <sup>-1</sup> | 3       | 0       | 13           | 0              | 13  | 100%       | 0.746 | 1 x 10 <sup>4</sup> .746 | 4 x 10 <sup>5</sup> .746<br>2228742.996 |
| 10 <sup>2</sup> | 10 <sup>-2</sup> | 3       | 0       | 10           | 0              | 10  | 100%       |       |                          |                                         |
| 10 <sup>3</sup> | 10 <sup>-3</sup> | 3       | 0       | 7            | 0              | 7   | 100%       |       |                          |                                         |
| 10 <sup>4</sup> | 10 <sup>-4</sup> | 3       | 0       | 4            | 0              | 4   | 100%       |       |                          |                                         |
| 10 <sup>5</sup> | 10 <sup>-5</sup> | 1       | 2       | 1            | 2              | 3   | 33%        |       |                          |                                         |
| 10 <sup>6</sup> | 10 <sup>-6</sup> | 0       | 3       | 0            | 5              | 5   | 0%         |       |                          |                                         |
| 10 <sup>7</sup> | 10 <sup>-7</sup> | 0       | 3       | 0            | 8              | 8   | 0%         |       |                          |                                         |
| 10 <sup>8</sup> | 10 <sup>-8</sup> | 0       | 3       | 0            | 11             | 11  | 0%         |       |                          |                                         |
| 2.28            |                  |         |         |              |                |     |            |       |                          |                                         |
| Dilution        | Dilution         | No. pos | No. neg | Infected (A) | Uninfected (B) | A+B | % infected | Index | TCID50/25 $\mu$ l        | TCID50/ml                               |
| 10 <sup>1</sup> | 10 <sup>-1</sup> | 3       | 0       | 12           | 0              | 12  | 100%       | 0.500 | 1 x 10 <sup>4</sup> .500 | 4 x 10 <sup>5</sup> .500<br>1264911.06  |
| 10 <sup>2</sup> | 10 <sup>-2</sup> | 3       | 0       | 9            | 0              | 9   | 100%       |       |                          |                                         |
| 10 <sup>3</sup> | 10 <sup>-3</sup> | 3       | 0       | 6            | 0              | 6   | 100%       |       |                          |                                         |
| 10 <sup>4</sup> | 10 <sup>-4</sup> | 3       | 0       | 3            | 0              | 3   | 100%       |       |                          |                                         |
| 10 <sup>5</sup> | 10 <sup>-5</sup> | 0       | 3       | 0            | 3              | 3   | 0%         |       |                          |                                         |
| 10 <sup>6</sup> | 10 <sup>-6</sup> | 0       | 3       | 0            | 6              | 6   | 0%         |       |                          |                                         |
| 10 <sup>7</sup> | 10 <sup>-7</sup> | 0       | 3       | 0            | 9              | 9   | 0%         |       |                          |                                         |
| 10 <sup>8</sup> | 10 <sup>-8</sup> | 0       | 3       | 0            | 12             | 12  | 0%         |       |                          |                                         |
| 2.29            |                  |         |         |              |                |     |            |       |                          |                                         |
| Dilution        | Dilution         | No. pos | No. neg | Infected (A) | Uninfected (B) | A+B | % infected | Index | TCID50/25 $\mu$ l        | TCID50/ml                               |
| 10 <sup>1</sup> | 10 <sup>-1</sup> | 3       | 0       | 16           | 0              | 16  | 100%       | 0.000 | 1 x 10 <sup>6</sup> .00  | 4 x 10 <sup>7</sup><br>40000000.00      |
| 10 <sup>2</sup> | 10 <sup>-2</sup> | 3       | 0       | 13           | 0              | 13  | 100%       |       |                          |                                         |
| 10 <sup>3</sup> | 10 <sup>-3</sup> | 3       | 0       | 10           | 0              | 10  | 100%       |       |                          |                                         |
| 10 <sup>4</sup> | 10 <sup>-4</sup> | 3       | 0       | 7            | 0              | 7   | 100%       |       |                          |                                         |
| 10 <sup>5</sup> | 10 <sup>-5</sup> | 2       | 1       | 4            | 1              | 5   | 80%        |       |                          |                                         |
| 10 <sup>6</sup> | 10 <sup>-6</sup> | 2       | 1       | 2            | 2              | 4   | 50%        |       |                          |                                         |
| 10 <sup>7</sup> | 10 <sup>-7</sup> | 0       | 3       | 0            | 5              | 5   | 0%         |       |                          |                                         |
| 10 <sup>8</sup> | 10 <sup>-8</sup> | 0       | 3       | 0            | 8              | 8   | 0%         |       |                          |                                         |
| 2.30            |                  |         |         |              |                |     |            |       |                          |                                         |
| Dilution        | Dilution         | No. pos | No. neg | Infected (A) | Uninfected (B) | A+B | % infected | Index | TCID50/25 $\mu$ l        | TCID50/ml                               |
| 10 <sup>1</sup> | 10 <sup>-1</sup> | 3       | 0       | 12           | 0              | 12  | 100%       | 0.500 | 1 x 10 <sup>4</sup> .500 | 4 x 10 <sup>5</sup> .500<br>1264911.06  |
| 10 <sup>2</sup> | 10 <sup>-2</sup> | 3       | 0       | 9            | 0              | 9   | 100%       |       |                          |                                         |
| 10 <sup>3</sup> | 10 <sup>-3</sup> | 3       | 0       | 6            | 0              | 6   | 100%       |       |                          |                                         |
| 10 <sup>4</sup> | 10 <sup>-4</sup> | 3       | 0       | 3            | 0              | 3   | 100%       |       |                          |                                         |
| 10 <sup>5</sup> | 10 <sup>-5</sup> | 0       | 3       | 0            | 3              | 3   | 0%         |       |                          |                                         |
| 10 <sup>6</sup> | 10 <sup>-6</sup> | 0       | 3       | 0            | 6              | 6   | 0%         |       |                          |                                         |
| 10 <sup>7</sup> | 10 <sup>-7</sup> | 0       | 3       | 0            | 9              | 9   | 0%         |       |                          |                                         |
| 10 <sup>8</sup> | 10 <sup>-8</sup> | 0       | 3       | 0            | 12             | 12  | 0%         |       |                          |                                         |

| 3.41            |                 |         |         |              |                |     |            |       |                          |                                         |
|-----------------|-----------------|---------|---------|--------------|----------------|-----|------------|-------|--------------------------|-----------------------------------------|
| Dilution        | Dilution        | No. pos | No. neg | Infected (A) | Uninfected (B) | A+B | % infected | Index | TCID50/25 $\mu$ l        | TCID50/ml                               |
| 10 <sup>1</sup> | 10 <sup>1</sup> | 3       | 0       | 12           | 0              | 12  | 100%       | 0.500 | 1 x 10 <sup>4</sup> .500 | 4 x 10 <sup>5</sup> .500<br>1264911.06  |
| 10 <sup>2</sup> | 10 <sup>2</sup> | 3       | 0       | 9            | 0              | 9   | 100%       |       |                          |                                         |
| 10 <sup>3</sup> | 10 <sup>3</sup> | 3       | 0       | 6            | 0              | 6   | 100%       |       |                          |                                         |
| 10 <sup>4</sup> | 10 <sup>4</sup> | 3       | 0       | 3            | 0              | 3   | 100%       |       |                          |                                         |
| 10 <sup>5</sup> | 10 <sup>5</sup> | 0       | 3       | 0            | 3              | 3   | 0%         |       |                          |                                         |
| 10 <sup>6</sup> | 10 <sup>6</sup> | 0       | 3       | 0            | 6              | 6   | 0%         |       |                          |                                         |
| 10 <sup>7</sup> | 10 <sup>7</sup> | 0       | 3       | 0            | 9              | 9   | 0%         |       |                          |                                         |
| 10 <sup>8</sup> | 10 <sup>8</sup> | 0       | 3       | 0            | 12             | 12  | 0%         |       |                          |                                         |
| 3.42            |                 |         |         |              |                |     |            |       |                          |                                         |
| Dilution        | Dilution        | No. pos | No. neg | Infected (A) | Uninfected (B) | A+B | % infected | Index | TCID50/25 $\mu$ l        | TCID50/ml                               |
| 10 <sup>1</sup> | 10 <sup>1</sup> | 3       | 0       | 14           | 0              | 14  | 100%       | 0.253 | 1 x 10 <sup>5</sup> .253 | 4 x 10 <sup>6</sup> .253<br>7162423.41  |
| 10 <sup>2</sup> | 10 <sup>2</sup> | 3       | 0       | 11           | 0              | 11  | 100%       |       |                          |                                         |
| 10 <sup>3</sup> | 10 <sup>3</sup> | 3       | 0       | 8            | 0              | 8   | 100%       |       |                          |                                         |
| 10 <sup>4</sup> | 10 <sup>4</sup> | 3       | 0       | 5            | 0              | 5   | 100%       |       |                          |                                         |
| 10 <sup>5</sup> | 10 <sup>5</sup> | 2       | 1       | 2            | 1              | 3   | 67%        |       |                          |                                         |
| 10 <sup>6</sup> | 10 <sup>6</sup> | 0       | 3       | 0            | 4              | 4   | 0%         |       |                          |                                         |
| 10 <sup>7</sup> | 10 <sup>7</sup> | 0       | 3       | 0            | 7              | 7   | 0%         |       |                          |                                         |
| 10 <sup>8</sup> | 10 <sup>8</sup> | 0       | 3       | 0            | 10             | 10  | 0%         |       |                          |                                         |
| 3.43            |                 |         |         |              |                |     |            |       |                          |                                         |
| Dilution        | Dilution        | No. pos | No. neg | Infected (A) | Uninfected (B) | A+B | % infected | Index | TCID50/25 $\mu$ l        | TCID50/ml                               |
| 10 <sup>1</sup> | 10 <sup>1</sup> | 3       | 0       | 13           | 0              | 13  | 100%       | 0.746 | 1 x 10 <sup>4</sup> .746 | 4 x 10 <sup>5</sup> .746<br>2228742.99  |
| 10 <sup>2</sup> | 10 <sup>2</sup> | 3       | 0       | 10           | 0              | 10  | 100%       |       |                          |                                         |
| 10 <sup>3</sup> | 10 <sup>3</sup> | 3       | 0       | 7            | 0              | 7   | 100%       |       |                          |                                         |
| 10 <sup>4</sup> | 10 <sup>4</sup> | 3       | 0       | 4            | 0              | 4   | 100%       |       |                          |                                         |
| 10 <sup>5</sup> | 10 <sup>5</sup> | 1       | 2       | 1            | 2              | 3   | 33%        |       |                          |                                         |
| 10 <sup>6</sup> | 10 <sup>6</sup> | 0       | 3       | 0            | 5              | 5   | 0%         |       |                          |                                         |
| 10 <sup>7</sup> | 10 <sup>7</sup> | 0       | 3       | 0            | 8              | 8   | 0%         |       |                          |                                         |
| 10 <sup>8</sup> | 10 <sup>8</sup> | 0       | 3       | 0            | 11             | 11  | 0%         |       |                          |                                         |
| 3.44            |                 |         |         |              |                |     |            |       |                          |                                         |
| Dilution        | Dilution        | No. pos | No. neg | Infected (A) | Uninfected (B) | A+B | % infected | Index | TCID50/25 $\mu$ l        | TCID50/ml                               |
| 10 <sup>1</sup> | 10 <sup>1</sup> | 3       | 0       | 13           | 0              | 13  | 100%       | 0.746 | 1 x 10 <sup>4</sup> .746 | 4 x 10 <sup>5</sup> .746<br>2228742.996 |
| 10 <sup>2</sup> | 10 <sup>2</sup> | 3       | 0       | 10           | 0              | 10  | 100%       |       |                          |                                         |
| 10 <sup>3</sup> | 10 <sup>3</sup> | 3       | 0       | 7            | 0              | 7   | 100%       |       |                          |                                         |
| 10 <sup>4</sup> | 10 <sup>4</sup> | 3       | 0       | 4            | 0              | 4   | 100%       |       |                          |                                         |
| 10 <sup>5</sup> | 10 <sup>5</sup> | 1       | 2       | 1            | 2              | 3   | 33%        |       |                          |                                         |
| 10 <sup>6</sup> | 10 <sup>6</sup> | 0       | 3       | 0            | 5              | 5   | 0%         |       |                          |                                         |
| 10 <sup>7</sup> | 10 <sup>7</sup> | 0       | 3       | 0            | 8              | 8   | 0%         |       |                          |                                         |
| 10 <sup>8</sup> | 10 <sup>8</sup> | 0       | 3       | 0            | 11             | 11  | 0%         |       |                          |                                         |
| 3.45            |                 |         |         |              |                |     |            |       |                          |                                         |
| Dilution        | Dilution        | No. pos | No. neg | Infected (A) | Uninfected (B) | A+B | % infected | Index | TCID50/25 $\mu$ l        | TCID50/ml                               |
| 10 <sup>1</sup> | 10 <sup>1</sup> | 3       | 0       | 15           | 0              | 15  | 100%       | 0.500 | 1 x 10 <sup>5</sup> .500 | 4 x 10 <sup>6</sup> .500<br>12649110.64 |
| 10 <sup>2</sup> | 10 <sup>2</sup> | 3       | 0       | 12           | 0              | 12  | 100%       |       |                          |                                         |
| 10 <sup>3</sup> | 10 <sup>3</sup> | 3       | 0       | 9            | 0              | 9   | 100%       |       |                          |                                         |
| 10 <sup>4</sup> | 10 <sup>4</sup> | 3       | 0       | 6            | 0              | 6   | 100%       |       |                          |                                         |
| 10 <sup>5</sup> | 10 <sup>5</sup> | 2       | 1       | 3            | 1              | 4   | 75%        |       |                          |                                         |
| 10 <sup>6</sup> | 10 <sup>6</sup> | 1       | 2       | 1            | 3              | 4   | 25%        |       |                          |                                         |
| 10 <sup>7</sup> | 10 <sup>7</sup> | 0       | 3       | 0            | 6              | 6   | 0%         |       |                          |                                         |
| 10 <sup>8</sup> | 10 <sup>8</sup> | 0       | 3       | 0            | 9              | 9   | 0%         |       |                          |                                         |

Table S8 MTT optical density in prevention model

1.11

| Dilution   | Raw OD |       |       | Mean  | SEM   |
|------------|--------|-------|-------|-------|-------|
|            | 1      | 2     | 3     |       |       |
| 0.1        | 0.456  | 0.431 | 0.430 | 0.439 | 0.009 |
| 0.01       | 0.406  | 0.441 | 0.488 | 0.445 | 0.024 |
| 0.001      | 0.402  | 0.489 | 0.568 | 0.486 | 0.048 |
| 0.0001     | 0.812  | 0.810 | 0.906 | 0.843 | 0.032 |
| 0.00001    | 1.688  | 1.001 | 1.097 | 1.262 | 0.215 |
| 0.000001   | 1.470  | 1.555 | 1.527 | 1.517 | 0.025 |
| 0.0000001  | 1.782  | 1.633 | 1.597 | 1.671 | 0.057 |
| 0.00000001 | 1.943  | 1.629 | 1.546 | 1.706 | 0.121 |

1.12

| Dilution   | Raw OD |       |       | Mean  | SEM   |
|------------|--------|-------|-------|-------|-------|
|            | 1      | 2     | 3     |       |       |
| 0.1        | 0.225  | 0.276 | 0.277 | 0.259 | 0.017 |
| 0.01       | 0.397  | 0.407 | 0.397 | 0.400 | 0.003 |
| 0.001      | 0.467  | 0.449 | 0.437 | 0.451 | 0.009 |
| 0.0001     | 0.742  | 0.633 | 0.690 | 0.688 | 0.031 |
| 0.00001    | 1.523  | 1.144 | 1.150 | 1.272 | 0.125 |
| 0.000001   | 1.564  | 1.262 | 1.305 | 1.377 | 0.094 |
| 0.0000001  | 1.636  | 1.670 | 1.522 | 1.609 | 0.045 |
| 0.00000001 | 1.760  | 1.676 | 1.635 | 1.690 | 0.037 |

1.13

| Dilution   | Raw OD |       |       | Mean  | SEM   |
|------------|--------|-------|-------|-------|-------|
|            | 1      | 2     | 3     |       |       |
| 0.1        | 0.207  | 0.237 | 0.318 | 0.254 | 0.033 |
| 0.01       | 0.386  | 0.411 | 0.432 | 0.410 | 0.013 |
| 0.001      | 0.415  | 0.501 | 0.397 | 0.438 | 0.032 |
| 0.0001     | 0.852  | 0.962 | 0.770 | 0.861 | 0.056 |
| 0.00001    | 1.500  | 1.110 | 1.491 | 1.367 | 0.129 |
| 0.000001   | 1.538  | 1.664 | 1.446 | 1.549 | 0.063 |
| 0.0000001  | 1.633  | 1.585 | 1.558 | 1.592 | 0.022 |
| 0.00000001 | 1.808  | 1.656 | 1.361 | 1.608 | 0.131 |

## 1.14

| Dilution   | Raw OD |       |       | Mean  | SEM   |
|------------|--------|-------|-------|-------|-------|
|            | 1      | 2     | 3     |       |       |
| 0.1        | 0.158  | 0.167 | 0.158 | 0.161 | 0.003 |
| 0.01       | 0.347  | 0.471 | 0.457 | 0.425 | 0.039 |
| 0.001      | 0.621  | 0.513 | 0.476 | 0.537 | 0.043 |
| 0.0001     | 0.728  | 0.638 | 0.726 | 0.697 | 0.030 |
| 0.00001    | 1.452  | 1.154 | 1.163 | 1.256 | 0.098 |
| 0.000001   | 1.143  | 1.815 | 1.372 | 1.443 | 0.197 |
| 0.0000001  | 1.587  | 1.902 | 1.171 | 1.553 | 0.212 |
| 0.00000001 | 1.651  | 1.866 | 1.517 | 1.678 | 0.102 |

## 1.15

| Dilution   | Raw OD |       |       | Mean  | SEM   |
|------------|--------|-------|-------|-------|-------|
|            | 1      | 2     | 3     |       |       |
| 0.1        | 0.112  | 0.124 | 0.112 | 0.116 | 0.004 |
| 0.01       | 0.405  | 0.155 | 0.348 | 0.303 | 0.076 |
| 0.001      | 0.400  | 0.508 | 0.347 | 0.418 | 0.047 |
| 0.0001     | 0.549  | 0.927 | 0.537 | 0.671 | 0.128 |
| 0.00001    | 1.472  | 1.098 | 1.060 | 1.210 | 0.131 |
| 0.000001   | 1.506  | 1.574 | 1.628 | 1.569 | 0.035 |
| 0.0000001  | 1.633  | 1.851 | 1.600 | 1.695 | 0.079 |
| 0.00000001 | 1.718  | 1.757 | 1.724 | 1.733 | 0.012 |

## 2.26

| Dilution   | Raw OD |       |       | Mean  | SEM   |
|------------|--------|-------|-------|-------|-------|
|            | 1      | 2     | 3     |       |       |
| 0.1        | 0.211  | 0.229 | 0.230 | 0.223 | 0.006 |
| 0.01       | 0.441  | 0.582 | 0.362 | 0.462 | 0.064 |
| 0.001      | 0.478  | 0.552 | 0.509 | 0.513 | 0.021 |
| 0.0001     | 0.604  | 0.988 | 0.612 | 0.735 | 0.127 |
| 0.00001    | 1.581  | 1.146 | 0.926 | 1.218 | 0.192 |
| 0.000001   | 1.662  | 1.600 | 1.035 | 1.432 | 0.199 |
| 0.0000001  | 1.512  | 1.417 | 1.540 | 1.490 | 0.037 |
| 0.00000001 | 1.694  | 1.779 | 1.711 | 1.728 | 0.026 |

## 2.27

| Dilution   | Raw OD |       |       | Mean  | SEM   |
|------------|--------|-------|-------|-------|-------|
|            | 1      | 2     | 3     |       |       |
| 0.1        | 0.183  | 0.192 | 0.238 | 0.204 | 0.017 |
| 0.01       | 0.514  | 0.556 | 0.524 | 0.531 | 0.013 |
| 0.001      | 0.550  | 0.441 | 0.595 | 0.529 | 0.046 |
| 0.0001     | 0.646  | 0.569 | 0.979 | 0.731 | 0.126 |
| 0.00001    | 1.166  | 1.167 | 1.645 | 1.326 | 0.160 |
| 0.000001   | 1.546  | 1.257 | 1.477 | 1.427 | 0.087 |
| 0.0000001  | 1.566  | 1.813 | 1.772 | 1.717 | 0.076 |
| 0.00000001 | 1.665  | 1.797 | 1.976 | 1.813 | 0.090 |

## 2.28

| Dilution   | Raw OD |       |       | Mean  | SEM   |
|------------|--------|-------|-------|-------|-------|
|            | 1      | 2     | 3     |       |       |
| 0.1        | 0.250  | 0.267 | 0.330 | 0.282 | 0.024 |
| 0.01       | 0.456  | 0.379 | 0.497 | 0.444 | 0.035 |
| 0.001      | 0.532  | 0.365 | 0.490 | 0.462 | 0.050 |
| 0.0001     | 0.730  | 0.844 | 0.681 | 0.752 | 0.048 |
| 0.00001    | 0.911  | 1.306 | 1.480 | 1.232 | 0.168 |
| 0.000001   | 1.633  | 1.449 | 1.394 | 1.492 | 0.072 |
| 0.0000001  | 1.605  | 1.640 | 1.774 | 1.673 | 0.052 |
| 0.00000001 | 1.597  | 1.615 | 1.883 | 1.698 | 0.092 |

## 2.29

| Dilution   | Raw OD |       |       | Mean  | SEM   |
|------------|--------|-------|-------|-------|-------|
|            | 1      | 2     | 3     |       |       |
| 0.1        | 0.193  | 0.220 | 0.252 | 0.222 | 0.017 |
| 0.01       | 0.400  | 0.353 | 0.534 | 0.429 | 0.054 |
| 0.001      | 0.515  | 0.439 | 0.512 | 0.489 | 0.025 |
| 0.0001     | 0.725  | 0.562 | 0.759 | 0.682 | 0.061 |
| 0.00001    | 1.088  | 0.631 | 1.249 | 0.989 | 0.185 |
| 0.000001   | 1.145  | 1.484 | 1.177 | 1.269 | 0.108 |
| 0.0000001  | 1.594  | 1.623 | 1.059 | 1.425 | 0.183 |
| 0.00000001 | 1.698  | 1.685 | 1.690 | 1.691 | 0.004 |

## 2.30

| Dilution   | Raw OD |       |       | Mean  | SEM   |
|------------|--------|-------|-------|-------|-------|
|            | 1      | 2     | 3     |       |       |
| 0.1        | 0.191  | 0.209 | 0.264 | 0.221 | 0.022 |
| 0.01       | 0.460  | 0.497 | 0.529 | 0.495 | 0.020 |
| 0.001      | 0.485  | 0.490 | 0.559 | 0.511 | 0.024 |
| 0.0001     | 0.819  | 0.898 | 1.151 | 0.956 | 0.100 |
| 0.00001    | 1.684  | 1.144 | 1.351 | 1.393 | 0.157 |
| 0.000001   | 1.669  | 1.573 | 1.623 | 1.622 | 0.028 |
| 0.0000001  | 1.691  | 1.313 | 1.845 | 1.616 | 0.158 |
| 0.00000001 | 1.755  | 1.739 | 1.373 | 1.622 | 0.125 |

## 3.41

| Dilution   | Raw OD |       |       | Mean  | SEM   |
|------------|--------|-------|-------|-------|-------|
|            | 1      | 2     | 3     |       |       |
| 0.1        | 0.180  | 0.300 | 0.278 | 0.253 | 0.037 |
| 0.01       | 0.412  | 0.477 | 0.455 | 0.448 | 0.019 |
| 0.001      | 0.427  | 0.443 | 0.478 | 0.449 | 0.015 |
| 0.0001     | 0.743  | 1.122 | 0.881 | 0.915 | 0.111 |
| 0.00001    | 1.250  | 1.526 | 1.789 | 1.522 | 0.156 |
| 0.000001   | 1.643  | 1.721 | 1.284 | 1.549 | 0.135 |
| 0.0000001  | 1.748  | 1.800 | 1.780 | 1.776 | 0.015 |
| 0.00000001 | 1.674  | 1.720 | 1.300 | 1.565 | 0.133 |

## 3.42

| Dilution   | Raw OD |       |       | Mean  | SEM   |
|------------|--------|-------|-------|-------|-------|
|            | 1      | 2     | 3     |       |       |
| 0.1        | 0.151  | 0.144 | 0.174 | 0.156 | 0.009 |
| 0.01       | 0.451  | 0.087 | 0.481 | 0.340 | 0.127 |
| 0.001      | 0.495  | 0.432 | 0.537 | 0.488 | 0.031 |
| 0.0001     | 0.568  | 0.596 | 0.650 | 0.605 | 0.024 |
| 0.00001    | 0.708  | 0.754 | 0.996 | 0.819 | 0.089 |
| 0.000001   | 1.577  | 1.685 | 1.295 | 1.519 | 0.116 |
| 0.0000001  | 1.756  | 1.269 | 1.020 | 1.348 | 0.216 |
| 0.00000001 | 1.257  | 1.717 | 1.716 | 1.563 | 0.153 |

## 3.43

| Dilution   | Raw OD |       |       | Mean  | SEM   |
|------------|--------|-------|-------|-------|-------|
|            | 1      | 2     | 3     |       |       |
| 0.1        | 0.291  | 0.258 | 0.292 | 0.280 | 0.011 |
| 0.01       | 0.444  | 0.475 | 0.517 | 0.479 | 0.021 |
| 0.001      | 0.492  | 0.505 | 0.533 | 0.510 | 0.012 |
| 0.0001     | 0.875  | 0.622 | 0.822 | 0.773 | 0.077 |
| 0.00001    | 1.410  | 1.643 | 1.186 | 1.413 | 0.132 |
| 0.000001   | 1.479  | 1.343 | 1.387 | 1.403 | 0.040 |
| 0.0000001  | 1.330  | 1.269 | 1.468 | 1.356 | 0.059 |
| 0.00000001 | 1.624  | 1.801 | 1.074 | 1.500 | 0.219 |

## 3.44

| Dilution   | Raw OD |       |       | Mean  | SEM   |
|------------|--------|-------|-------|-------|-------|
|            | 1      | 2     | 3     |       |       |
| 0.1        | 0.199  | 0.198 | 0.193 | 0.197 | 0.002 |
| 0.01       | 0.176  | 0.170 | 0.535 | 0.294 | 0.121 |
| 0.001      | 0.515  | 0.512 | 0.582 | 0.536 | 0.023 |
| 0.0001     | 0.739  | 0.559 | 0.723 | 0.674 | 0.058 |
| 0.00001    | 1.360  | 0.792 | 1.367 | 1.173 | 0.191 |
| 0.000001   | 1.115  | 1.564 | 1.110 | 1.263 | 0.151 |
| 0.0000001  | 1.560  | 1.776 | 1.148 | 1.495 | 0.184 |
| 0.00000001 | 1.597  | 1.618 | 1.403 | 1.539 | 0.068 |

## 3.45

| Dilution   | Raw OD |       |       | Mean  | SEM   |
|------------|--------|-------|-------|-------|-------|
|            | 1      | 2     | 3     |       |       |
| 0.1        | 0.167  | 0.202 | 0.193 | 0.187 | 0.010 |
| 0.01       | 0.428  | 0.344 | 0.446 | 0.406 | 0.031 |
| 0.001      | 0.445  | 0.424 | 0.584 | 0.484 | 0.050 |
| 0.0001     | 0.936  | 0.636 | 0.788 | 0.787 | 0.087 |
| 0.00001    | 1.046  | 1.348 | 1.339 | 1.244 | 0.099 |
| 0.000001   | 1.453  | 1.188 | 1.163 | 1.268 | 0.093 |
| 0.0000001  | 1.677  | 1.560 | 1.218 | 1.485 | 0.138 |
| 0.00000001 | 1.708  | 1.716 | 1.341 | 1.588 | 0.124 |



Figure S1. Representative images of lung histopathology scores and area affected at termination in treatment model.

**Mouse 1.3 (x2.5 and x20). PR8 infection, control.**

Severe bronchiolitis with lumen filled with inflammatory cells and debris (1), haemorrhage (2), interstitial and alveolar inflammation(3)

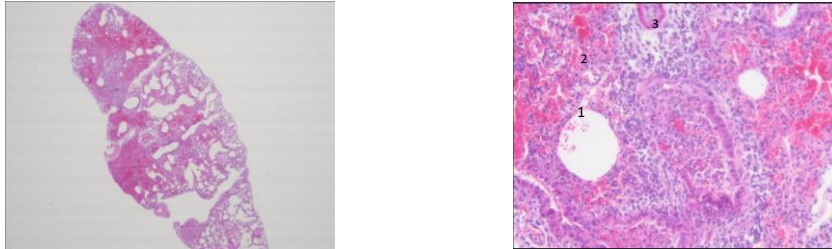

**Mouse 2.11 (x2.5 and x20). PR8 infection, fucoidan at 3.52mg/day.**

Focal bronchiolar epithelial disruption and inflammation(1); consolidation of alveolar tissue (2).

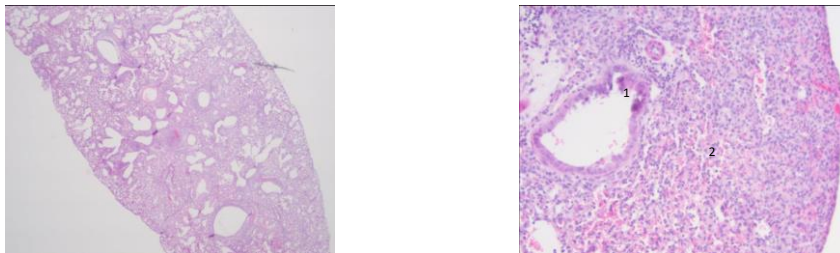

Figure S2. Mean TCID<sub>50</sub> values of lung homogenates. Data are presented as mean TCID<sub>50</sub> of group (n = 5) ± SEM.

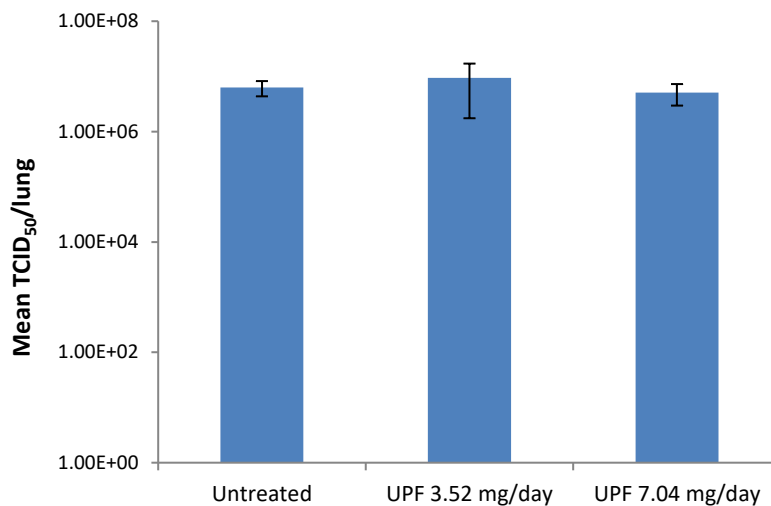

Supplement: marinedrugs-18-00246-s001.pdf [file marinedrugs-18-00246-s001.pdf]
